# Supplementary material
Source: publisher figshare collection journal article supplement (https://gsajournals.figshare.com/ndownloader/files/28730484)
Supplement: Supplementary file 1 [file 28730484]

**Supporting Information**

**Designing and Optimization Wild Type Ancestral and Mutant Specific Primers**

We designed diagnostics primers specific for the *LacZ* reporter inserted in *B. cenocepacia* HI2424at the attTn7 site 9 and specific for the *B. cenocepacia* HI2424 genome. We used the web software tool Primer3 (Whitehead Institute for Biomedical Research, Massachusetts Institute of Technology [MIT]) to design primers for PCR (Koressaar and Remm 2007). To ensure primer specificity, each primer was BLASTed (Basic Local Alignment Search Tool, National Center for Biotechnology Information [NCBI]), against the reference *B. cenocepacia* genome to check that PCR primers match only our intended target (Gish 1993). We checked for the secondary structure of the amplicon using the M fold program (http://mfold.rna.albany.edu/qmfold). “Open” primer binding sites were selected with low amounts internal pairing at the PCR annealing temperature.

For the mutant detection *B. cenocepacia* HI2424Eva Green-based ddPCR mixture containing a final concentration of 300nM primers was formulated. For the wild type detection *B. cenocepacia* HI2424 *lacZ* strain, Eva Green-based ddPCR mixture containing a final concentration of 100 nM primers was formulated.

**Optimizing PCR Conditions and Multiplex Assays**

To optimize PCR annealing temperatures, we performed a thermal gradient ddPCR with temperatures ranging from 50°C to 64°C using the same DNA and primer concentrations as described above. Ideally, the temperature should be as high as possible so as to minimize unspecific PCR amplification while still allowing for a clear separation of positive and negative bands. We found that lower temperatures led to good band separation while the distance between bands decreased and became less distinct for temperatures above 59°C. From these results, we chose an optimal annealing temperature of 59°C, which is the highest temperature that still resulted in clear band separation (Fig. S1). Afterwards we optimized starting concentrations for DNA template and primers. For the DNA template, we determined that the lowest amount of template that still resulted in well-separated bands was 28pg/µL and tested three 10-fold dilutions for each replicate sample.

For primers, Bio-Rad (2014) recommends using a range of 75nM to 1000nM, but we chose to first test a range of concentrations, including 50 nM/100 nM, 100 nM/300 nM, 150 nM/ 400 nM for the wild type/mutant population within a sample. A primer set of concentration of 100nM/300 nM led to the best results with reduced rain and more distinct negative and positive bands (Fig. S1).

To increase the quantification accuracy of DNA template digestion (i.e. a clearer separation of positive and negative bands) we performed an on-bench fast digest *Eco RI* restriction digestion (as explained in above) for 5 min at room temperature immediately prior to the addition of template DNA to the PCR reaction. It is important to note that some intermediate droplets (rain) will still occur, even after maximal possible ddPCR optimization, but those can be accounted for during the data analysis using the software thresholding tools. In order to ensure that random amplification was not occurring, no template controls (NTC) were also tested during the optimization process. After optimization, we found that we were able to resolve clear positive and negative band for Channel 1 in the 1D and 2D plots of ddPCR analyzer (Fig. S1).


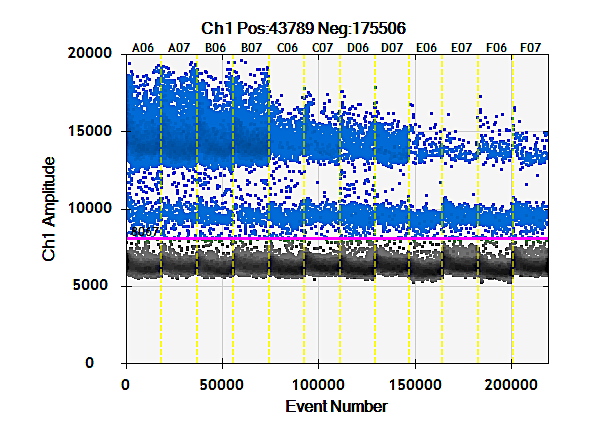


3


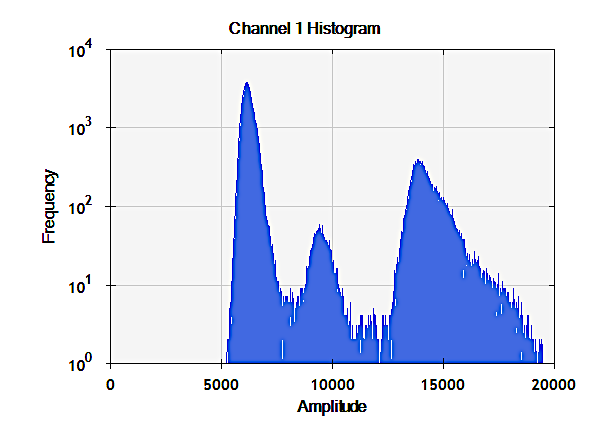


**Figure S1. Absolute quantification by ddPCR of wild and mutant populations with dilutions of known concentrations of DNA.** **(Top Left Panel**) Straight-line graph with ddPCR quantification versus sample DNA concentration**.** DNA concentrations were used as the from its dilution series (280 ng/µl in A06-07, 28 ng/µl in B06-07, 2.8 ng/µl in C06-07, 0.28 ng/µL in D06-07, 0.028 ng/µl in E06-07 ,0.0028 ng/µl in F06-07). **(Top Right Panel)** 1- D plot (with purple line showing automatic threshold by the ddPCR QuantaSoft software) from ddPCR analysis and showing the clear separation of the mutant population (1), wild type (2), and negative populations (3). Optimized sample DNA concentration for wild-type and mutant populations**.** Six replicate wells are shown in the plots A-F, with 06 and 07 being technical replicates in. middle panel). **(Bottom Panel)** 2-D plot from ddPCR analysis and showing the clear separation of the wild type and mutant population. Here it is showing separation of mutant *lacZ*- (1), wild-type *lacZ*+ (2), and negative populations (3). A precision of ±5% is maintained regardless of the thresholding method used.

We ran ddPCR for the samples with wild type and mutant populations at decreasing nucleic acid concentration by diluting them serially. We found that the excellent separation between positive droplets (blue 1 and 2) and negative droplets (3 gray) can be achieved at concentration and 0.028 ng /µl with the least rain effect. The histogram on the right side also showed the clear separation as in the plot’s amplitude vs. the frequency of the populations of droplets. We have found that distinct separation of these clusters allows a copy number can be calculated with high precision (Fig.S1).

QuantaSoft Software have been utilized for the automated analysis that measures the number of positive and negative droplets for each fluorophore in each sample. It fits the fraction of positive droplets to a Poisson algorithm to determine the starting concentration of the target DNA molecule in units of copies/μl input from the sample. Similarly, varying amplicon length instead of PCR efficiency can be used to measure multiple targets in the same well. After optimizing the conditions to conduct a ddPCR experiment, the precision and resolving power afforded by partitioning are unprecedented. Thereby this method provides absolute quantification, eliminating the need to develop standards. Absolute quantification with ddPCR is extremely accurate, providing accuracy better than 15% with a confidence level of 95%. Use of ddPCR in absolute quantification and for measuring fitness effects in multiplex population significantly increases reliability and quality, and optimizes use of consumables, labor, and instrument time.


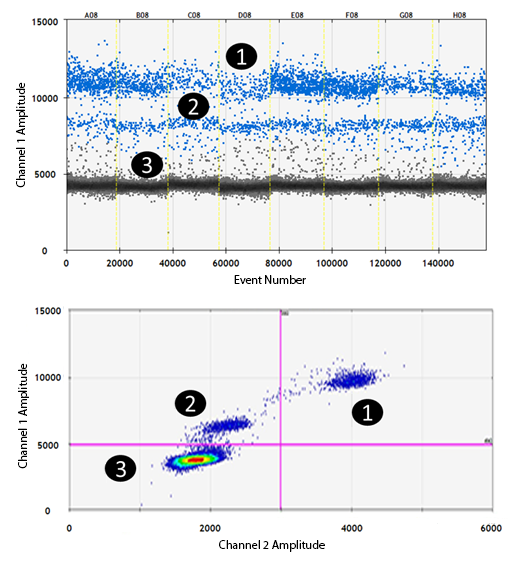


**Figure S2**. **Representative one-dimensional (topmost) and two-dimensional plot (bottom) for ddPCR.** Images with separation positive droplets (1&2) and negative droplets c0 (3) as well as clear separation of mutant ccombined (1) and wild type cwt (2) population at decreasing primer concentration. Optimal annealing temperature and template dilution for this locus is at 59°C and 28pg/µL respectively.

**Method Used for the *lacZ* Allele Insertion in Ancestor Wild Type *B. cenocepacia* HI2424**

In the wild type strain *B. cenocepacia* HI2424 *lacZ* gene has been introduced at the attTn7 site which causes colonies to turn blue when exposed to 5-bromo-4-chloro-indolylβ-galactopyranoside (X-gal) (Choi, Gaynor et al. 2005). In brief, *lacZ* has been introduced using a Tn7-based broad-range bacterial cloning and expression system as described by Choi et al. Tn7 can insert a high frequency into bacterial chromosomes site- and orientation-specifically at Tn7 attachment, or attTn7, sites. These sites are located downstream of highly conserved glmS genes, which encode the essential glucosamine-6-phosphate synthetase gene (Craig 1996, Peters and Craig 2001), but recognition by the transposase also requires critical portions of the glmS 3’ region (Peters and Craig 2001). This Tn7 transposition system minimally requires the Tn7 left (Tn7L) and Tn7 right (Tn7R) ends, and the transposase complex, which comprises the products of five genes, tnsABCD+E that catalyze high-frequency transposition into attTn7. Transposon delivery and transient expression of transposase are achieved with the help of suicide plasmids, which only persist transiently in a target bacterium because it cannot support replication of these plasmids. A series of small, fully sequenced mini-Tn7 vectors, which contain selection markers that, after transposition, can be excised from the bacterial chromosome with yeast Flp recombinase (Hoang, Karkhoff-Schweizer et al. 1998). Mini-Tn7 transposition into diverse target bacteria for gene complementation and expression system is feasible in the biofilms and an animal model, as well as for establishment of regulated gene expression system.



**F****igure S3. Repeated ddPCR measurements for four lines with beneficial changes and six lines with deleterious changes.** Colony counting methods were repeated following the work of Dillon et al.(Dillon and Cooper 2016). The cumulative effect of mutations on fitness (Scum) from the ten repeated in-house colony counting measurements show a positive but non-significant correlation with ddPCR measurements (Table S6). Linear regression given as equation y=0.00378 +0.36234x (ρ = 0.4753, adj. r2 = 0.12915).


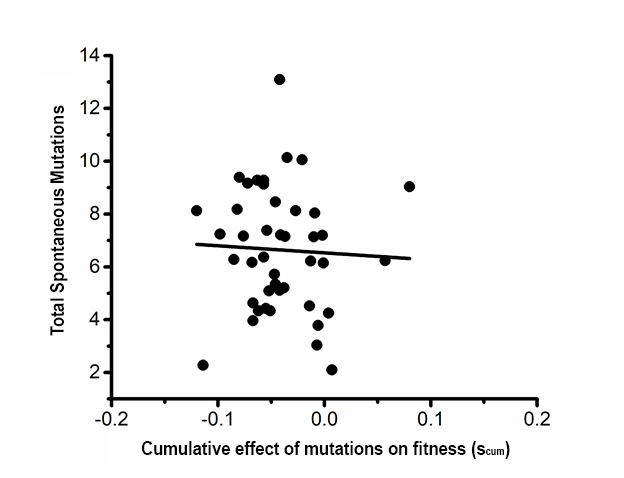


**Figure S4. Cumulative effect of mutations on fitness (scum) plotted against the total number of spontaneous mutations for each *B. cenocepacia* MA lineage for ddPCR** (*r* = -0.04, p = 0.77).


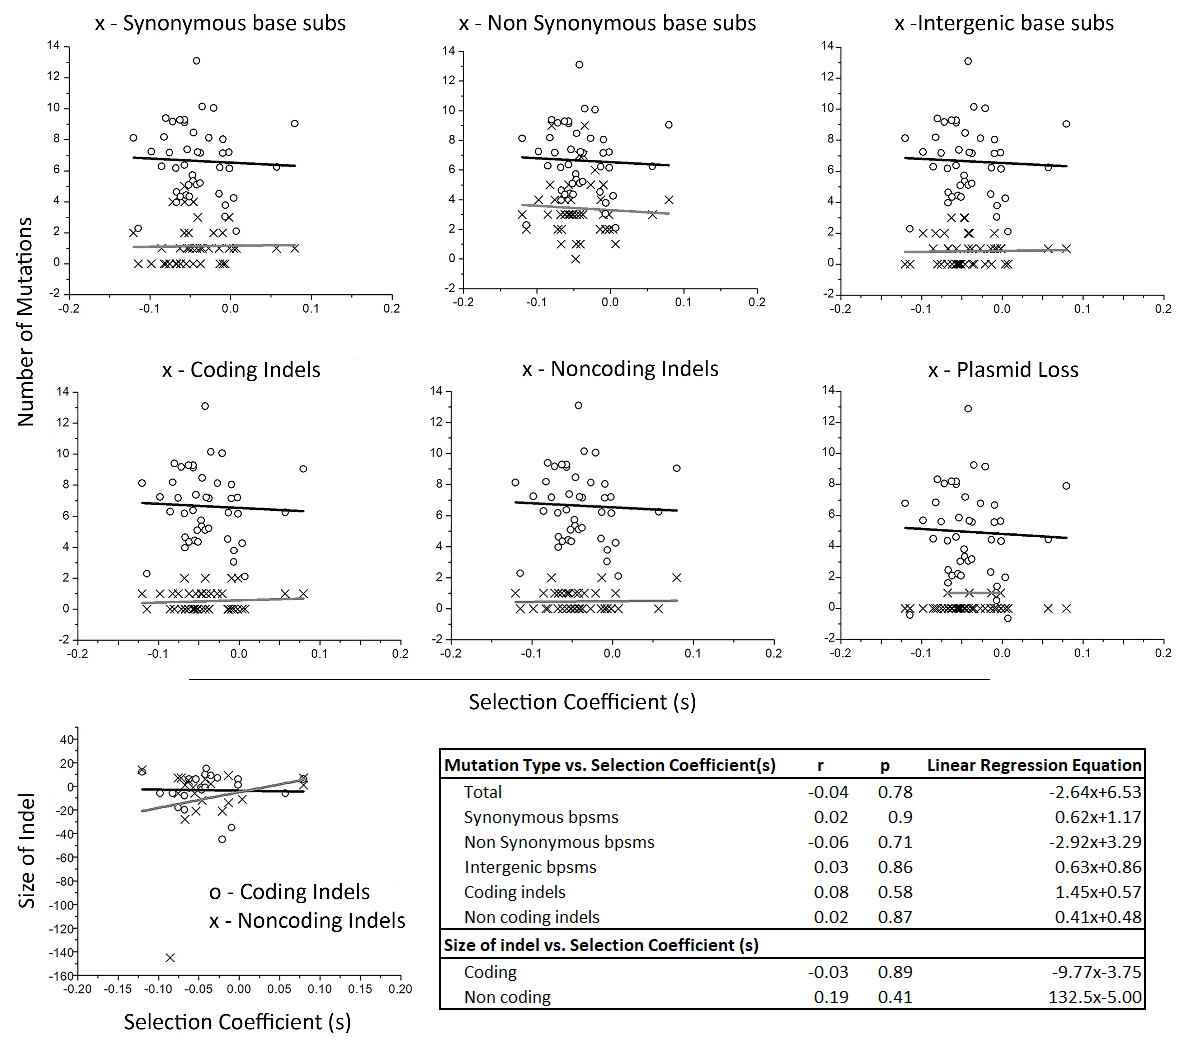


**Figure S5**. Selection coefficients against the total number of spontaneous mutations. For all except bottom left panel, each open circle represents the total mutations for a single MA line and x indicate the mutation type (response variable) for that panel. For bottom left panel, open circle represents coding indels and x represents noncoding indels. Regression coefficient, p-value, and linear regression equation listed for each comparison in figure tab. To test for effects of selection coefficients on the total number of mutations harbored in each lineage, we performed a regression analysis and ANOVA on the cumulative data set.

**Table S1.** ddPCR and colony counting measurements for increasing dosages of ampicillin with (WT+lacZ) and without ampicillin resistant construct (lacZ). Three biological replicates were performed for each concentration.

| Amp(ng/mL) | Biological replicate | ddPCR (copies per microliter) | | | Colony counts (×105) | | |
| --- | --- | --- | --- | --- | --- | --- | --- |
| WT+LacZ | WT | %CV | WT+ lacZ | WT | %CV |
| 25 | 1 | 24.90 | 102.2 | 5.04 | 600 | 600 | 10.19 |
|  | 2 | 22.12 | 123.8 |  | 600 | 500 |  |
|  | 3 | 24.34 | 102.5 |  | 500 | 550 |  |
| 50 | 1 | 22.90 | 59.8 | 6.93 | 372 | 69 | 23.62 |
|  | 2 | 19.40 | 85.7 |  | 600 | 80 |  |
|  | 3 | 22.01 | 38.9 |  | 550 | 40 |  |
| 100 | 1 | 20.40 | 9.7 | 4.18 | 800 | 46 | 45.58 |
|  | 2 | 22.30 | 10.6 |  | 800 | 40 |  |
|  | 3 | 22.35 | 9.2 |  | 300 | 28 |  |
| 200 | 1 | 24.31 | 6.8 | 9.17 | 350 | 14 | 26.66 |
|  | 2 | 25.23 | 5.7 |  | 559 | 24 |  |
|  | 3 | 20.31 | 6.5 |  | 600 | 18 |  |
| 300 | 1 | 24.01 | 5.4 | 4.70 | 560 | 7 | 11.95 |
|  | 2 | 22.01 | 4.6 |  | 700 | 12 |  |
|  | 3 | 21.58 | 1.5 |  | 590 | 9 |  |
| 400 | 1 | 24.12 | 1.7 | 3.41 | 700 | 6 | 21.03 |
|  | 2 | 22.20 | 4.2 |  | 500 | 11 |  |
|  | 3 | 23.00 | 3.1 |  | 490 | 8 |  |
| 500 | 1 | 22.97 | 1.12 | 1.95 | 600 | 1 | 9.09 |
|  | 2 | 23.12 | 1.9 |  | 500 | 4 |  |
|  | 3 | 22.11 | 2.4 |  | 550 | 1 |  |
| 600 | 1 | 22.91 | 1.37 | 1.97 | 800 | 2 | 15.44 |
|  | 2 | 21.92 | 1.11 |  | 600 | 1 |  |
|  | 3 | 22.81 | 1.7 |  | 790 | 2 |  |
| Average |  |  |  | 4.67 |  |  | 20.44 |
|  |  |  |  |  |  |  |  |

**Table S2.** **Optimal Sample DNA Concentration for ddPCR Absolute Quantification.** This data shows the optimization of DNA sample to be used to ensure separation of wild-type and mutant as shown in Fig. S1. Absolute quantification shows the copies per microliter that corresponds to DNA concentration of combined wild-type and mutant samples. SD, SEM, and %CV, show the standard deviation, standard error measurements, and coefficient of variation for the measurements respectively. From this data, 0.028 ng/µL showed the lowest measurement standard deviation with respectable %CV.

| DNA concentration (ng per microliter) | Absolute Quantification in copies per microliter  Mean (individual values) | SD | SEM | %CV |
| --- | --- | --- | --- | --- |
| 280 | 948 (945,964,935) | 12.02 | 6.94 | 1.26 |
| 870 (867,885,858) | 11.22 | 6.48 | 1.28 |
| 28 | 706.6 (704,720,696) | 9.97 | 5.76 | 1.41 |
| 681 (679,693,671) | 9.09 | 5.24 | 1.33 |
| 2.8 | 106.46 (105.6,110.9,102.9) | 3.32 | 1.91 | 3.11 |
| 101.83 (101,106.1,98.4) | 3.19 | 1.84 | 3.13 |
| 0.28 | 86.9 (86.1,90.9,83.7) | 2.99 | 1.72 | 3.44 |
| 59.23 (58.6,62.5,56.6) | 2.44 | 1.41 | 4.11 |
| 0.028 | 33.76 (33.3,36.2,31.8) | 1.82 | 1.05 | 5.39 |
| 31.8 (31.3,34.2,29.9) | 1.79 | 1.03 | 5.62 |
| 0.0028 | 29.43 (29,31.7,27.6) | 1.70 | 0.98 | 5.77 |
| 24.96 (24,30.3,20.6) | 4.01 | 2.32 | 16.06 |

**Table S3.** Cumulative selection coefficient (scum), average effects per mutation, and independent two tailed t-test (T) for each of the 43 mutation accumulation lineages in tryptic soy environment. scum shown for plate assay (plate)(Dillon and Cooper 2016), ddPCR, and differential plate assays repeated in this experiment (plate repeat). SEM is the standard error for the ddPCR measurements. Uncorrected p-values (P) and Benjamini-Hochberg (BH) corrected p-values from T-test are shown (DF = 3 for all tests). Total number of mutations are estimated based on observed mutations weighted by analyzable genomic sites in the original MA experiment (Dillon and Cooper 2016).

| MA Line | scum (ddPCR) | | scum (plate) | scum (plate repeat) | SEM | | | T | P | P(BH) | # Mut | Average Effect per Mutation (ddPCR) | |
| --- | --- | --- | --- | --- | --- | --- | --- | --- | --- | --- | --- | --- | --- |
| 1 | -0.0351 | | -0.0117 |  | 0.026 | | | 5.99 | 0.00185 | 0.00319 | 10.14 | -0.00345 | |
| 2 | -0.0569 | | -0.0445 |  | 0.036 | | | 3.90 | 0.01134 | 0.01478 | 9.13 | -0.00624 | |
| 4 | 0.0038 | | 0.0131 | 0.032 | 0.021 | | | -0.99 | 0.36042 | 0.37800 | 4.25 | 0.00094 | |
| 6 | -0.0550 | | -0.0739 |  | 0.001 | | | 17.46 | 0.00001 | 0.00008 | 4.43 | -0.01242 | |
| 8 | -0.0669 | | -0.0265 |  | 0.015 | | | 7.77 | 0.00024 | 0.00068 | 4.63 | -0.01447 | |
| 10 | -0.0459 | | -0.0432 |  | 0.021 | | | 3.92 | 0.00773 | 0.01038 | 8.46 | -0.00544 | |
| 11 | -0.0536 | | 0.0212 | -0.014 | 0.031 | | | 2.95 | 0.03189 | 0.03706 | 7.38 | -0.00732 | |
| 12 | -0.0620 | | -0.0278 |  | 0.013 | | | 7.17 | 0.00018 | 0.00056 | 4.34 | -0.01429 | |
| 13 | -0.0671 | | 0.0155 | 0.024 | 0.022 | | | 4.75 | 0.00313 | 0.00456 | 3.96 | -0.01692 | |
| 14 | -0.0269 | | -0.1001 |  | 0.009 | | | 5.62 | 0.00050 | 0.00119 | 8.13 | -0.00332 | |
| 15 | -0.0133 | | -0.0519 |  | 0.020 | | | 3.70 | 0.02071 | 0.02544 | 6.22 | -0.00209 | |
| 20 | -0.0509 | | -0.0039 |  | 0.013 | | | 7.00 | 0.00033 | 0.00084 | 4.34 | -0.01175 | |
| 23 | -0.0570 | | -0.0049 |  | 0.018 | | | 5.21 | 0.00198 | 0.00328 | 9.28 | -0.00614 | |
| 24 | -0.0572 | | -0.0079 | -0.007 | 0.011 | | | -1.19 | 0.26962 | 0.28984 | 6.37 | -0.00895 | |
| 26 | -0.0678 | | -0.0648 |  | 0.029 | | | 3.58 | 0.01566 | 0.01981 | 6.17 | -0.01102 | |
| 27 | -0.0854 | | -0.027 |  | 0.006 | | | 13.90 | 0.00000 | 0.00003 | 6.28 | -0.01354 | |
| 28 | -0.0801 | | -0.1115 |  | 0.023 | | | 4.83 | 0.00289 | 0.00444 | 9.39 | -0.00852 | |
| 29 | -0.0064 | | -0.0144 | -0.010 | 0.015 | | | 0.80 | 0.45446 | 0.46528 | 3.78 | -0.00159 | |
| 30 | -0.0373 | | -0.0097 |  | 0.012 | | | 6.00 | 0.00054 | 0.00122 | 7.15 | -0.00517 | |
| 31 | -0.0068 | | -0.0037 |  | 0.023 | | | -1.94 | 0.09966 | 0.11278 | 3.04 | -0.00230 | |
| 32 | -0.0143 | | -0.0354 |  | 0.017 | | | 3.07 | 0.02185 | 0.02610 | 4.52 | -0.00310 | |
| 33 | -0.0421 | | -0.0323 |  | 0.016 | | | 4.74 | 0.00318 | 0.00456 | 13.09 | -0.00321 | |
| 34 | -0.0756 | | -0.0143 |  | 0.021 | | | 7.35 | 0.00032 | 0.00084 | 7.17 | -0.01060 | |
| 35 | -0.1144 | | -0.0503 |  | 0.013 | | | 8.94 | 0.00004 | 0.00024 | 2.28 | -0.05000 | |
| 36 | -0.0979 | | -0.0113 |  | 0.009 | | | 15.06 | 0.00000 | 0.00010 | 7.24 | -0.01354 | |
| 37 | -0.0626 | | -0.0125 |  | 0.007 | | | 9.60 | 0.00001 | 0.00004 | 9.28 | -0.00679 | |
| 41 | -0.0473 | | -0.0046 |  | 0.010 | | | 5.39 | 0.00065 | 0.00127 | 5.72 | -0.00822 | |
| 43 | -0.0014 | | -0.0147 |  | 0.014 | | | 1.29 | 0.23774 | 0.26213 | 6.15 | -0.00016 | |
| 45 | -0.0464 | | -0.0426 |  | 0.006 | | | 10.78 | 0.00000 | 0.00001 | 5.34 | -0.00861 | |
| 47 | -0.0420 | | -0.0381 |  | 0.003 | | | 13.00 | 0.00000 | 0.00001 | 5.11 | -0.00822 | |
| 49 | -0.0021 | | -0.0726 | -0.088 | 0.003 | | | 6.81 | 0.00014 | 0.00048 | 7.2 | -0.00028 | |
| 51 | -0.0095 | | -0.0178 |  | 0.002 | | | 8.73 | 0.00013 | 0.00048 | 8.04 | -0.00112 | |
| 53 | 0.0071 | | -0.0092 | -0.002 | 0.012 | | | 7.77 | 0.00011 | 0.00047 | 2.1 | -0.00333 | |
| 56 | -0.0096 | | -0.0152 |  | 0.006 | | | 6.47 | 0.00007 | 0.00034 | 7.14 | -0.00126 | |
| 57 | -0.0717 | | -0.0114 |  | 0.016 | | | 6.46 | 0.00065 | 0.00127 | 9.17 | -0.00785 | |
| 59 | -0.0377 | | 0.0076 |  | 0.030 | | | 6.71 | 0.00111 | 0.00207 | 5.21 | -0.00729 | |
| 62 | 0.0571 | | 0.002 | 0.003 | 0.011 | | | 10.01 | 0.00002 | 0.00013 | 6.24 | 0.00913 | |
| 63 | -0.1201 | | -0.0338 | -0.043 | 0.025 | | | 6.22 | 0.00156 | 0.00280 | 8.13 | -0.01476 | |
| 65 | -0.0209 | | -0.0171 |  | 0.008 | | | 6.27 | 0.00015 | 0.00048 | 10.06 | -0.00209 | |
| 68 | -0.0408 | | -0.0486 |  | 0.039 | | | 0.56 | 0.59550 | 0.59550 | 7.21 | -0.00569 | |
| 69 | -0.0824 | | -0.0148 |  | 0.025 | | | 7.56 | 0.00064 | 0.00127 | 8.18 | -0.01002 | |
| 71 | -0.0518 | | -0.0233 |  | 0.017 | | | 5.07 | 0.00229 | 0.00364 | 5.09 | -0.01022 | |
| 74 | 0.0796 | | 0.0371 | 0.085 | 0.015 | | | 4.35 | 0.00479 | 0.00665 | 9.04 | 0.00874 | |
| **Table S4**. Cumulative selection coefficient (scum) and two sample (Independent) T-test statistics (T) for each of the forty-three mutation accumulation lineages for the comparison of ddPCR vs. plate assay(Dillon and Cooper 2016) and SEM is the standard error of mean for their respective measurements. Uncorrected p values (P) and Benjamini-Hochberg (BH) corrected p-values from T-test are shown (DF = 3 for all tests).   | **MA line** | **scum (ddPCR)** | **SEM (ddPCR)** | **scum (plate)** | **SEM (plate)** | **T** | **P(uncorrected)** | **P(BH-corrected)** | | --- | --- | --- | --- | --- | --- | --- | --- | | 1 | -0.035 | 0.019 | -0.012 | 0.039 | -0.501 | 0.6184 | 0.755 | | 2 | -0.057 | 0.036 | -0.045 | 0.021 | -0.284 | 0.7771 | 0.844 | | 4 | 0.004 | 0.021 | 0.013 | 0.011 | -1.078 | 0.2846 | 0.408 | | 6 | -0.055 | 0.007 | -0.074 | 0.084 | 0.313 | 0.7549 | 0.844 | | 8 | -0.067 | 0.015 | -0.027 | 0.009 | -3.295 | 0.0015 | 0.003 | | 10 | -0.046 | 0.021 | -0.043 | 0.004 | -0.175 | 0.8654 | 0.908 | | 11 | -0.054 | 0.031 | 0.021 | 0.010 | -3.183 | 0.0026 | 0.005 | | 12 | -0.062 | 0.013 | -0.028 | 0.008 | -3.136 | 0.0024 | 0.005 | | 13 | -0.067 | 0.022 | 0.016 | 0.009 | -4.909 | 4.6E-06 | 2E-05 | | 14 | -0.027 | 0.009 | -0.100 | 0.010 | 7.593 | 3.9E-11 | 4E-10 | | 15 | -0.013 | 0.020 | -0.052 | 0.011 | 2.336 | 0.0219 | 0.041 | | 20 | -0.051 | 0.013 | -0.004 | 0.007 | -4.550 | 1.8E-05 | 7E-05 | | 23 | -0.057 | 0.018 | -0.005 | 0.008 | -3.777 | 0.0003 | 9E-04 | | 24 | -0.057 | 0.011 | -0.008 | 0.010 | -4.642 | 1.5E-05 | 6.5E-05 | | 26 | -0.068 | 0.029 | -0.065 | 0.002 | -0.144 | 0.8890 | 0.910 | | 27 | -0.085 | 0.006 | -0.027 | 0.004 | 12.000 | 1.6E-19 | 2.3E-18 | | 28 | -0.080 | 0.023 | -0.112 | 0.013 | 1.676 | 0.0974 | 0.175 | | 29 | -0.006 | 0.015 | -0.014 | 0.007 | 0.661 | 0.5101 | 0.665 | | 30 | -0.037 | 0.012 | -0.010 | 0.004 | -3.126 | 0.0025 | 0.005 | | 31 | -0.007 | 0.023 | -0.004 | 0.049 | -0.081 | 0.9364 | 0.936 | | 32 | -0.014 | 0.017 | -0.035 | 0.007 | 1.619 | 0.1092 | 0.187 | | 33 | -0.042 | 0.016 | -0.032 | 0.006 | -0.786 | 0.4376 | 0.607 | | 34 | -0.076 | 0.021 | -0.014 | 0.002 | -4.053 | 2.2E-05 | 7.9E-05 | | 35 | -0.114 | 0.013 | -0.050 | 0.008 | -5.915 | 7.1E-08 | 5.3E-07 | | 36 | -0.098 | 0.008 | -0.011 | 0.006 | -1.788 | 1.1E-19 | 2.3E-18 | | 37 | -0.063 | 0.007 | -0.013 | 0.010 | -5.910 | 7E-08 | 5E-07 | | 41 | -0.047 | 0.010 | -0.005 | 0.013 | -3.652 | 0.0005 | 0.001 | | 43 | -0.001 | 0.014 | -0.015 | 0.002 | 1.352 | 0.1799 | 0.276 | | 45 | -0.046 | 0.006 | -0.043 | 0.016 | -0.318 | 0.7507 | 0.844 | | 47 | -0.042 | 0.003 | -0.038 | 0.004 | -1.112 | 0.2693 | 0.399 | | 49 | -0.002 | 0.003 | -0.073 | 0.003 | 22.040 | 1.3E-36 | 5.5E-35 | | 51 | -0.009 | 0.002 | -0.018 | 0.003 | 3.542 | 0.0007 | 0.002 | | 53 | 0.007 | 0.012 | -0.009 | 0.008 | 1.579 | 0.1181 | 0.188 | | 56 | -0.010 | 0.005 | -0.015 | 0.009 | 0.741 | 0.4605 | 0.619 | | 57 | -0.072 | 0.016 | -0.011 | 0.006 | -4.878 | 5.0E-06 | 2.4E-05 | | 59 | -0.038 | 0.030 | 0.007 | 0.010 | -1.607 | 0.1134 | 0.1875 | | 62 | 0.057 | 0.011 | 0.002 | 0.009 | 5.282 | 1.38E-06 | 6.1E-06 | | 63 | -0.120 | 0.025 | -0.034 | 0.014 | -4.192 | 0.0001 | 2.3E-04 | | 65 | -0.021 | 0.008 | -0.017 | 0.008 | -0.481 | 0.6318 | 0.7546 | | 68 | -0.041 | 0.039 | -0.049 | 0.008 | 0.273 | 0.7852 | 0.844 | | 69 | -0.082 | 0.025 | -0.015 | 0.002 | -3.729 | 0.0004 | 0.001 | | 71 | -0.052 | 0.017 | -0.022 | 0.063 | 0.6306 | 0.5304 | 0.671 | | 74 | 0.080 | 0.015 | 0.037 | 0.010 | 3.2113 | 0.0019 | 0.004 |   **Table S5.** Mutations and cumulative effect of mutations on fitness (scum) measured by ddPCR for each MA line. 99% confidence interval for s is -0.057 < X < -0.026. Line_Chr_Site indicates the MA line, chromosome, and the site of the mutation delimited by underscore. Mutation column (Mut) is the size of the indel (#) or the base-substitution mutation, with the Type column denoting whether the mutation is synonymous (S), nonsynonymous (NS), intergenic (IG), coding (COD), or plasmid (P). Highlighted mutations in excinuclease subunit (green) and Lys regulatory proteins (red) shown in Table 2. | | | | | | | | | | | | |
| **S_ddPCR** | | **Line_Chr_Site** | | **Mut** | | **Type** | **Gene product** | | | | | |
| -0.1201 | | 63_1_1274325 | | +14 | | IG | - | | | | | |
| -0.1201 | | 63_1_2680077 | | +12 | | COD | excinuclease ABC subunit C | | | | | |
| -0.1201 | | 63_2_1419197 | | A>G | | IG | - | | | | | |
| -0.1201 | | 63_3_338442 | | C>A | | NS | hypothetical protein | | | | | |
| -0.1201 | | 63_1_1853286 | | C>T | | S | CitMHS family citrate/H+ symporter | | | | | |
| -0.1201 | | 63_1_2087196 | | C>T | | S | LysM domain/BON superfamily protein | | | | | |
| -0.1201 | | 63_1_1905389 | | T>G | | NS | TonB-dependent receptor | | | | | |
| -0.1201 | | 63_2_2293256 | | T>G | | NS | hypothetical protein | | | | | |
| -0.1144 | | 35_1_2509657 | | A>C | | NS | 30S ribosomal protein S15 | | | | | |
| -0.1144 | | 35_2_1552375 | | G>T | | NS | fusaric acid resistance protein region | | | | | |
| -0.0979 | | 36_1_133081 | | -6 | | COD | heavy metal translocating P-type ATPase | | | | | |
| -0.0979 | | 36_2_105075 | | C>T | | IG | - | | | | | |
| -0.0979 | | 36_2_1794047 | | C>T | | NS | aspartate carbamoyltransferase | | | | | |
| -0.0979 | | 36_1_1905103 | | G>A | | NS | TonB-dependent receptor | | | | | |
| -0.0979 | | 36_1_2829105 | | T>C | | NS | ornithine carbamoyltransferase | | | | | |
| -0.0979 | | 36_1_329402 | | T>G | | IG | - | | | | | |
| -0.0979 | | 36_1_1318402 | | T>G | | NS | acriflavin resistance protein | | | | | |
| -0.0854 | | 27_1_787822 | | -145 | | IG | - | | | | | |
| -0.0854 | | 27_2_1427947 | | A>G | | NS | hypothetical protein | | | | | |
| -0.0854 | | 27_1_489535 | | C>T | | NS | cytochrome c1 | | | | | |
| -0.0854 | | 27_1_2277932 | | G>C | | S | malate synthase | | | | | |
| -0.0854 | | 27_1_268577 | | T>G | | NS | hypothetical protein | | | | | |
| -0.0854 | | 27_1_821875 | | T>G | | IG | - | | | | | |
| -0.0824 | | 69_1_2898913 | | -6 | | COD | periplasmic sensor signal transduction histidine kinase | | | | | |
| -0.0824 | | 69_3_722751 | | A>G | | NS | hypothetical protein | | | | | |
| -0.0824 | | 69_3_95320 | | C>A | | IG | - | | | | | |
| -0.0824 | | 69_1_1216039 | | C>T | | NS | hypothetical protein | | | | | |
| -0.0824 | | 69_2_42434 | | G>A | | NS | hypothetical protein | | | | | |
| -0.0824 | | 69_2_2256823 | | G>A | | NS | AraC family transcriptional regulator | | | | | |
| -0.0824 | | 69_2_2403171 | | G>T | | NS | aminotransferase, class IV | | | | | |
| -0.0824 | | 69_1_2819210 | | T>G | | IG | - | | | | | |
| -0.0801 | | 28_2_217063 | | A>G | | NS | DNA-binding transcriptional regulator CynR | | | | | |
| -0.0801 | | 28_1_530374 | | A>T | | NS | Rhs element Vgr protein | | | | | |
| -0.0801 | | 28_1_949702 | | C>G | | NS | hypothetical protein | | | | | |
| -0.0801 | | 28_1_2208015 | | C>T | | NS | inosine 5'-monophosphate dehydrogenase | | | | | |
| -0.0801 | | 28_2_1054295 | | C>T | | NS | FAD-dependent pyridine nucleotide-disulfide oxidoreductase | | | | | |
| -0.0801 | | 28_3_947845 | | C>T | | NS | GntR family transcriptional regulator | | | | | |
| -0.0801 | | 28_2_723656 | | G>A | | NS | molybdenum ABC transporter, periplasmic molybdate-binding protein | | | | | |
| -0.0801 | | 28_2_1400801 | | G>A | | NS | phosphoenolpyruvate carboxykinase | | | | | |
| -0.0801 | | 28_1_1299570 | | T>G | | NS | succinylglutamic semialdehyde dehydrogenase | | | | | |
| -0.0756 | | 34_1_922300 | | -6 | | IG | - | | | | | |
| -0.0756 | | 34_2_246899 | | 18 | | COD | endonuclease/exonuclease/phosphatase | | | | | |
| -0.0756 | | 34_2_676484 | | +7 | | IG | - | | | | | |
| -0.0756 | | 34_2_246914 | | A>C | | NS | endonuclease/exonuclease/phosphatase | | | | | |
| -0.0756 | | 34_1_3186629 | | G>A | | NS | YadA domain-containing protein | | | | | |
| -0.0756 | | 34_2_246917 | | G>A | | NS | endonuclease/exonuclease/phosphatase | | | | | |
| -0.0756 | | 34_3_457371 | | T>C | | NS | electron-transferring-flavoprotein dehydrogenase | | | | | |
| -0.0717 | | 57_1_163856 | | +7 | | IG | - | | | | | |
| -0.0717 | | 57_2_595584 | | A>G | | NS | hypothetical protein | | | | | |
| -0.0717 | | 57_1_241724 | | A>T | | S | hypothetical protein | | | | | |
| -0.0717 | | 57_1_637822 | | C>T | | S | UDP-3-O-[3-hydroxymyristoyl] N-acetylglucosamine deacetylase | | | | | |
| -0.0717 | | 57_1_2946490 | | G>A | | S | ThiJ/PfpI domain-containing protein | | | | | |
| -0.0717 | | 57_1_3093773 | | G>A | | S | A/G-specific adenine glycosylase | | | | | |
| -0.0717 | | 57_1_1030872 | | G>T | | NS | hypothetical protein | | | | | |
| -0.0717 | | 57_1_1068623 | | G>T | | IG | - | | | | | |
| -0.0717 | | 57_1_2281168 | | T>C | | IG | - | | | | | |
| -0.0678 | | 26_2_1376302 | | -20 | | COD | luciferase family protein | | | | | |
| -0.0678 | | 26_2_1996747 | | -8 | | COD | LysR family transcriptional regulator | | | | | |
| -0.0678 | | 26_P Deletion | | -164857 | | P | - | | | | | |
| -0.0678 | | 26_1_3245621 | | G>A | | NS | hypothetical protein | | | | | |
| -0.0678 | | 26_1_3301432 | | G>A | | NS | aldehyde dehydrogenase | | | | | |
| -0.0678 | | 26_3_934488 | | G>C | | NS | methyl-accepting chemotaxis sensory transducer | | | | | |
| -0.0671 | | 13_2_2597198 | | -28 | | IG | - | | | | | |
| -0.0671 | | 13_1_1230821 | | A>G | | IG | - | | | | | |
| -0.0671 | | 13_1_490954 | | G>A | | NS | ClpXP protease specificity-enhancing factor | | | | | |
| -0.0669 | | 8_3_184926 | | +1 | | IG | - | | | | | |
| -0.0669 | | 8_3_299835 | | A>G | | NS | hypothetical protein | | | | | |
| -0.0669 | | 8_3_582298 | | C>A | | IG | - | | | | | |
| -0.0669 | | 8_2_900035 | | C>T | | NS | response regulator receiver protein | | | | | |
| -0.0626 | | 37_1_3321874 | | +5 | | IG | - | | | | | |
| -0.0626 | | 37_1_616099 | | A>G | | NS | hypothetical protein | | | | | |
| -0.0626 | | 37_1_616106 | | A>G | | NS | hypothetical protein | | | | | |
| -0.0626 | | 37_1_3370374 | | A>G | | IG | - | | | | | |
| -0.0626 | | 37_1_1242710 | | C>T | | NS | GTP-binding protein LepA | | | | | |
| -0.0626 | | 37_1_2718375 | | G>A | | IG | - | | | | | |
| -0.0626 | | 37_1_2858805 | | G>A | | S | benzoylformate decarboxylase | | | | | |
| -0.0626 | | 37_2_2873473 | | G>A | | NS | 3-oxoadipate enol-lactonase | | | | | |
| -0.0626 | | 37_2_2498655 | | T>C | | IG | - | | | | | |
| -0.0620 | | 12_1_2512756 | | +6 | | COD | carbonate dehydratase | | | | | |
| -0.0620 | | 12_1_934070 | | A>G | | NS | 2Fe-2S ferredoxin, iron-sulfur binding site | | | | | |
| -0.0620 | | 12_2_349488 | | G>C | | NS | hypothetical protein | | | | | |
| -0.0620 | | 12_2_1519311 | | G>C | | NS | alpha-2-macroglobulin domain-containing protein | | | | | |
| -0.0572 | | 24_2_172254 | | -1 | | IG | - | | | | | |
| -0.0572 | | 24_2_1409088 | | A>T | | S | lysine exporter protein LysE/YggA | | | | | |
| -0.0572 | | 24_3_598965 | | C>T | | NS | LysR family transcriptional regulator | | | | | |
| -0.0572 | | 24_1_143249 | | G>C | | S | LysR family transcriptional regulator | | | | | |
| -0.0572 | | 24_1_1131159 | | G>T | | NS | amidase | | | | | |
| -0.0572 | | 24_1_2153602 | | T>C | | NS | hypothetical protein | | | | | |
| -0.0570 | | 23_3_952563 | | A>C | | IG | - | | | | | |
| -0.0570 | | 23_3_974655 | | A>G | | NS | hypothetical protein | | | | | |
| -0.0570 | | 23_1_1721694 | | A>T | | NS | arginyl-tRNA-protein transferase | | | | | |
| -0.0570 | | 23_1_198133 | | C>T | | S | amidohydrolase 2 | | | | | |
| -0.0570 | | 23_1_488852 | | C>T | | NS | cytochrome b/b6 domain-containing protein | | | | | |
| -0.0570 | | 23_2_1842430 | | C>T | | S | hypothetical protein | | | | | |
| -0.0570 | | 23_2_1534339 | | G>A | | S | magnesium-translocating P-type ATPase | | | | | |
| -0.0570 | | 23_2_2197996 | | G>A | | S | sarcosine oxidase subunit alpha | | | | | |
| -0.0570 | | 23_3_958125 | | G>A | | S | porin | | | | | |
| -0.0569 | | 2_2_1245654 | | A>C | | NS | IclR family transcriptional regulator | | | | | |
| -0.0569 | | 2_1_1475865 | | C>G | | S | molybdopterin binding aldehyde oxidase and xanthine dehydrogenase | | | | | |
| -0.0569 | | 2_2_1142455 | | C>G | | S | hypothetical protein | | | | | |
| -0.0569 | | 2_2_1912983 | | G>A | | S | 2-nitropropane dioxygenase | | | | | |
| -0.0569 | | 2_2_1895854 | | G>C | | NS | hypothetical protein | | | | | |
| -0.0569 | | 2_2_879700 | | G>T | | NS | selenocysteine-specific translation elongation factor | | | | | |
| -0.0569 | | 2_3_107672 | | G>T | | S | sodium:dicarboxylate symporter | | | | | |
| -0.0569 | | 2_2_1895853 | | T>C | | NS | hypothetical protein | | | | | |
| -0.0569 | | 2_1_2300483 | | T>G | | NS | proton-translocating NADH-quinone oxidoreductase, chain M | | | | | |
| -0.0550 | | 6_1_922300 | | -6 | | IG | - | | | | | |
| -0.0550 | | 6_1_1911475 | | G>A | | NS | TonB family protein | | | | | |
| -0.0550 | | 6_1_524402 | | T>A | | NS | hypothetical protein | | | | | |
| -0.0550 | | 6_1_680460 | | T>A | | NS | UDP-N-acetylmuramate | | | | | |
| -0.0536 | | 11_1_145180 | | -21 | | IG | - | | | | | |
| -0.0536 | | 11_1_2680077 | | +6 | | COD | excinuclease ABC subunit C | | | | | |
| -0.0536 | | 11_1_2162521 | | A>C | | NS | transcription-repair coupling factor | | | | | |
| -0.0536 | | 11_1_2926912 | | A>C | | NS | BNR repeat-containing glycosyl hydrolase | | | | | |
| -0.0536 | | 11_1_3456910 | | A>C | | NS | extracellular solute-binding protein | | | | | |
| -0.0536 | | 11_2_1246284 | | A>G | | NS | beta-lactamase domain-containing protein | | | | | |
| -0.0536 | | 11_2_1011220 | | C>T | | S | hypothetical protein | | | | | |
| -0.0518 | | 71_3_369326 | | A>G | | NS | RND family efflux transporter MFP subunit | | | | | |
| -0.0518 | | 71_3_525319 | | A>G | | NS | ABC transporter | | | | | |
| -0.0518 | | 71_2_482081 | | C>A | | S | binding-protein-dependent transport system inner membrane protein | | | | | |
| -0.0518 | | 71_1_2505432 | | C>G | | S | triosephosphate isomerase | | | | | |
| -0.0518 | | 71_3_286180 | | G>A | | NS | filamentation induced by cAMP protein fic | | | | | |
| -0.0509 | | 20_2_345032 | | C>T | | NS | hypothetical protein | | | | | |
| -0.0509 | | 20_2_1046813 | | C>T | | S | aldehyde dehydrogenase | | | | | |
| -0.0509 | | 20_2_1597026 | | G>C | | NS | RND efflux system outer membrane lipoprotein | | | | | |
| -0.0509 | | 20_1_1941561 | | T>A | | NS | beta-lactamase domain-containing protein | | | | | |
| -0.0473 | | 41_2_1367664 | | -1 | | COD | aldehyde oxidase xanthine dehydrogenase, molybdopterin binding | | | | | |
| -0.0473 | | 41_1_1687067 | | C>G | | S | type II secretion system protein | | | | | |
| -0.0473 | | 41_1_482440 | | G>A | | IG | - | | | | | |
| -0.0473 | | 41_1_2529411 | | G>T | | IG | - | | | | | |
| -0.0473 | | 41_2_566938 | | T>G | | IG | - | | | | | |
| -0.0464 | | 45_1_1094317 | | -3 | | COD | cell division topological specificity factor MinE | | | | | |
| -0.0464 | | 45_1_2956210 | | A>C | | IG | - | | | | | |
| -0.0464 | | 45_1_633251 | | A>T | | NS | polypeptide-transport-associated domain-containing protein | | | | | |
| -0.0464 | | 45_1_410641 | | C>A | | IG | - | | | | | |
| -0.0464 | | 45_1_2278790 | | T>C | | IG | - | | | | | |
| -0.0459 | | 10_1_922300 | | -12 | | IG | - | | | | | |
| -0.0459 | | 10_2_1404156 | | C>G | | NS | prolyl-tRNA synthetase | | | | | |
| -0.0459 | | 10_P_136142 | | C>G | | S | hypothetical protein | | | | | |
| -0.0459 | | 10_1_1931764 | | G>A | | S | RND family efflux transporter MFP subunit | | | | | |
| -0.0459 | | 10_2_2324860 | | G>A | | S | alpha/beta hydrolase | | | | | |
| -0.0459 | | 10_2_2949250 | | G>T | | S | BNR repeat-containing glycosyl hydrolase | | | | | |
| -0.0459 | | 10_1_2171739 | | T>A | | NS | hypothetical protein | | | | | |
| -0.0459 | | 10_2_2617857 | | T>C | | NS | aconitate hydratase | | | | | |
| -0.0421 | | 33_1_455220 | | -1 | | COD | amino acid carrier protein | | | | | |
| -0.0421 | | 33_1_922300 | | +6 | | IG | - | | | | | |
| -0.0421 | | 33_2_965455 | | +10 | | COD | methyl-accepting chemotaxis sensory transducer | | | | | |
| -0.0421 | | 33_2_1488915 | | A>C | | NS | sodium/calcium exchanger membrane region | | | | | |
| -0.0421 | | 33_3_839791 | | C>G | | NS | polar amino acid ABC transporter inner membrane subunit | | | | | |
| -0.0421 | | 33_1_1241162 | | C>T | | NS | protease Do | | | | | |
| -0.0421 | | 33_1_1886599 | | G>A | | IG | - | | | | | |
| -0.0421 | | 33_1_2010310 | | G>A | | IG | - | | | | | |
| -0.0421 | | 33_2_2099191 | | G>A | | NS | formyltetrahydrofolate deformylase | | | | | |
| -0.0421 | | 33_2_2307930 | | G>A | | S | propionyl-CoA carboxylase | | | | | |
| -0.0421 | | 33_1_1585184 | | G>C | | NS | peptidoglycan-binding LysM | | | | | |
| -0.0421 | | 33_3_601522 | | G>T | | NS | naphthoate synthase | | | | | |
| -0.0421 | | 33_2_1710471 | | T>C | | NS | MgtC/SapB transporter | | | | | |
| -0.0420 | | 47_2_1999344 | | A>G | | S | major facilitator transporter | | | | | |
| -0.0420 | | 47_2_1576119 | | C>G | | NS | hypothetical protein | | | | | |
| -0.0420 | | 47_2_56491 | | C>T | | NS | major facilitator transporter | | | | | |
| -0.0420 | | 47_2_1049263 | | T>C | | NS | amino acid permease | | | | | |
| -0.0420 | | 47_1_2637999 | | T>G | | IG | - | | | | | |
| -0.0408 | | 68_1_670780 | | +15 | | COD | hypothetical protein | | | | | |
| -0.0408 | | 68_P Deletion | | -164857 | | P | - | | | | | |
| -0.0408 | | 68_1_760328 | | G>A | | IG | - | | | | | |
| -0.0408 | | 68_1_2726975 | | G>A | | S | ABC transporter-like protein | | | | | |
| -0.0408 | | 68_2_2045786 | | G>A | | S | hypothetical protein | | | | | |
| -0.0408 | | 68_1_2894404 | | G>T | | IG | - | | | | | |
| -0.0408 | | 68_2_1420005 | | G>T | | S | acyltransferase | | | | | |
| -0.0408 | | 68_3_297137 | | G>T | | NS | ABC transporter | | | | | |
| -0.0377 | | 59_2_1650074 | | A>G | | NS | EmrB/QacA family drug resistance transporter | | | | | |
| -0.0377 | | 59_2_1085421 | | C>T | | IG | - | | | | | |
| -0.0377 | | 59_1_2656172 | | G>A | | NS | alpha,alpha-trehalose-phosphate synthase | | | | | |
| -0.0377 | | 59_3_765013 | | G>A | | S | cytochrome c oxidase subunit I | | | | | |
| -0.0377 | | 59_2_2092431 | | G>C | | NS | major facilitator transporter | | | | | |
| -0.0373 | | 30_2_2323029 | | A>G | | NS | N-acetyltransferase GCN5 | | | | | |
| -0.0373 | | 30_2_2743224 | | A>T | | NS | feruloyl esterase | | | | | |
| -0.0373 | | 30_2_1834260 | | C>T | | NS | hypothetical protein | | | | | |
| -0.0373 | | 30_1_1519949 | | G>A | | NS | cellulose synthase regulator protein | | | | | |
| -0.0373 | | 30_1_421773 | | G>T | | NS | protein-disulfide reductase | | | | | |
| -0.0373 | | 30_1_3260079 | | T>A | | NS | dihydrodipicolinate synthase | | | | | |
| -0.0373 | | 30_1_3282866 | | T>C | | NS | bile acid:sodium symporter | | | | | |
| -0.0351 | | 1_3_696158 | | +9 | | COD | ATP dependent DNA ligase | | | | | |
| -0.0351 | | 1_3_802109 | | +2 | | IG | - | | | | | |
| -0.0351 | | 1_2_1245654 | | A>C | | NS | IclR family transcriptional regulator | | | | | |
| -0.0351 | | 1_2_2757083 | | A>C | | NS | galactose 1-dehydrogenase | | | | | |
| -0.0351 | | 1_3_506801 | | C>A | | S | secreted protein | | | | | |
| -0.0351 | | 1_2_1061345 | | C>T | | NS | GntR family transcriptional regulator | | | | | |
| -0.0351 | | 1_1_16497 | | G>A | | NS | catalase domain-containing protein | | | | | |
| -0.0351 | | 1_1_2664603 | | G>A | | NS | hypothetical protein | | | | | |
| -0.0351 | | 1_1_3363861 | | G>A | | NS | ATPase central domain-containing protein | | | | | |
| -0.0351 | | 1_2_879700 | | G>T | | NS | selenocysteine-specific translation elongation factor | | | | | |
| -0.0351 | | 1_1_3043685 | | T>C | | NS | hypothetical protein | | | | | |
| -0.0351 | | 1_2_1139831 | | T>G | | NS | Beta-mannosidase | | | | | |
| -0.0269 | | 14_2_2106028 | | +7 | | COD | electron transfer flavoprotein subunit beta | | | | | |
| -0.0269 | | 14_1_279661 | | C>T | | IG | - | | | | | |
| -0.0269 | | 14_1_743097 | | C>T | | S | LysR family transcriptional regulator | | | | | |
| -0.0269 | | 14_1_402998 | | G>A | | NS | elongation factor G | | | | | |
| -0.0269 | | 14_2_1853826 | | G>A | | NS | YscD/HrpQ family type III secretion apparatus protein | | | | | |
| -0.0269 | | 14_1_1569454 | | G>T | | NS | ribokinase-like domain-containing protein | | | | | |
| -0.0269 | | 14_1_266370 | | T>G | | NS | hypothetical protein | | | | | |
| -0.0269 | | 14_1_2594908 | | T>G | | NS | ATPase | | | | | |
| -0.0209 | | 65_1_163856 | | -21 | | IG | - | | | | | |
| -0.0209 | | 65_1_1990467 | | -45 | | COD | hypothetical protein | | | | | |
| -0.0209 | | 65_3_231616 | | A>C | | NS | Sel1 domain-containing protein | | | | | |
| -0.0209 | | 65_2_838242 | | C>A | | S | tRNA pseudouridine synthase A | | | | | |
| -0.0209 | | 65_2_1875993 | | C>A | | S | phosphate acetyltransferase | | | | | |
| -0.0209 | | 65_1_1990472 | | C>G | | NS | hypothetical protein | | | | | |
| -0.0209 | | 65_1_46681 | | C>T | | NS | LysR family transcriptional regulator | | | | | |
| -0.0209 | | 65_2_473020 | | C>T | | NS | NAD/NADP octopine/nopaline dehydrogenase | | | | | |
| -0.0209 | | 65_1_2733816 | | T>C | | NS | dihydroxy-acid dehydratase | | | | | |
| -0.0209 | | 65_3_585589 | | T>G | | NS | hypothetical protein | | | | | |
| -0.0143 | | 32_2_1448148 | | C>A | | IG | - | | | | | |
| -0.0143 | | 32_2_2230367 | | C>G | | S | hypothetical protein | | | | | |
| -0.0143 | | 32_3_83699 | | G>C | | NS | 2-dehydropantoate 2-reductase | | | | | |
| -0.0143 | | 32_1_2500685 | | T>C | | NS | NADH-quinone oxidoreductase subunit F | | | | | |
| -0.0133 | | 15_1_3321945 | | -14 | | IG | - | | | | | |
| -0.0133 | | 15_2_2324957 | | +9 | | IG | - | | | | | |
| -0.0133 | | 15_P Deletion | | -164857 | | P | - | | | | | |
| -0.0133 | | 15_2_2460332 | | G>C | | NS | methyl-accepting chemotaxis sensory transducer with Pas/Pac sensor | | | | | |
| -0.0133 | | 15_3_99812 | | G>T | | NS | hydrophobe/amphiphile efflux-1 (HAE1) family protein | | | | | |
| -0.0133 | | 15_3_788228 | | T>A | | NS | binding-protein-dependent transport system inner membrane protein | | | | | |
| -0.0133 | | 15_3_804404 | | T>C | | NS | HipA domain-containing protein | | | | | |
| -0.0096 | | 56_1_1894779 | | A>G | | IG | - | | | | | |
| -0.0096 | | 56_1_1629896 | | C>T | | S | threonyl-tRNA synthetase | | | | | |
| -0.0096 | | 56_1_615897 | | G>A | | NS | Long-chain-fatty-acid--CoA ligase | | | | | |
| -0.0096 | | 56_1_1532848 | | G>A | | IG | - | | | | | |
| -0.0096 | | 56_1_2812999 | | G>A | | S | EmrB/QacA family drug resistance transporter | | | | | |
| -0.0096 | | 56_1_2859819 | | G>C | | NS | benzoylformate decarboxylase | | | | | |
| -0.0096 | | 56_3_18850 | | G>C | | NS | LysR family transcriptional regulator | | | | | |
| -0.0095 | | 51_1_461039 | | +27 | | COD | ABC transporter | | | | | |
| -0.0095 | | 51_1_2947143 | | -35 | | COD | cupin 2 domain-containing protein | | | | | |
| -0.0095 | | 51_2_1966193 | | A>T | | NS | enoyl-CoA hydratase/isomerase | | | | | |
| -0.0095 | | 51_1_844960 | | C>T | | NS | para-aminobenzoate synthase subunit I | | | | | |
| -0.0095 | | 51_1_1891445 | | C>T | | NS | TonB-dependent receptor | | | | | |
| -0.0095 | | 51_2_751890 | | C>T | | NS | RNA polymerase sigma factor RpoD | | | | | |
| -0.0095 | | 51_1_2001100 | | T>C | | IG | - | | | | | |
| -0.0095 | | 51_1_2947147 | | T>G | | NS | cupin 2 domain-containing protein | | | | | |
| -0.0068 | | 31_1_1672194 | | A>G | | NS | AFG1 family ATPase | | | | | |
| -0.0068 | | 31_1_1799647 | | C>A | | NS | extracytoplasmic-function sigma-70 factor | | | | | |
| -0.0068 | | 31_P_38370 | | C>T | | IG | - | | | | | |
| -0.0064 | | 29_1_3149991 | | C>T | | NS | type 11 methyltransferase | | | | | |
| -0.0064 | | 29_2_1637902 | | G>A | | NS | hypothetical protein | | | | | |
| -0.0064 | | 29_1_2275670 | | G>T | | IG | - | | | | | |
| -0.0021 | | 49_P Deletion | | -164857 | | P | - | | | | | |
| -0.0021 | | 49_3_825928 | | A>T | | IG | - | | | | | |
| -0.0021 | | 49_3_635097 | | C>A | | NS | oxidoreductase alpha (molybdopterin) subunit | | | | | |
| -0.0021 | | 49_1_704006 | | C>T | | NS | malic enzyme | | | | | |
| -0.0021 | | 49_1_1237260 | | C>T | | S | hypothetical protein | | | | | |
| -0.0021 | | 49_1_1790862 | | C>T | | S | multidrug efflux protein | | | | | |
| -0.0021 | | 49_3_786897 | | G>A | | S | binding-protein-dependent transport system inner membrane protein | | | | | |
| -0.0021 | | 49_1_962338 | | G>T | | NS | hypothetical protein | | | | | |
| -0.0014 | | 43_1_133081 | | +6 | | COD | heavy metal translocating P-type ATPase | | | | | |
| -0.0014 | | 43_1_2866485 | | +1 | | COD | major facilitator transporter | | | | | |
| -0.0014 | | 43_1_2519086 | | G>C | | IG | - | | | | | |
| -0.0014 | | 43_2_1464603 | | G>C | | S | uroporphyrin-III C-methyltransferase | | | | | |
| -0.0014 | | 43_1_3392052 | | T>A | | NS | aldo/keto reductase | | | | | |
| -0.0014 | | 43_1_274748 | | T>G | | NS | DegT/DnrJ/EryC1/StrS aminotransferase | | | | | |
| 0.0038 | | 4_1_351984 | | -11 | | IG | - | | | | | |
| 0.0038 | | 4_2_2516556 | | A>C | | NS | TetR family transcriptional regulator | | | | | |
| 0.0038 | | 4_P_41941 | | C>T | | S | hypothetical protein | | | | | |
| 0.0038 | | 4_2_2277624 | | T>A | | NS | ATPase central domain-containing protein | | | | | |
| 0.0071 | | 53_1_436433 | | C>T | | S | hypothetical protein | | | | | |
| 0.0071 | | 53_1_667816 | | T>A | | NS | ribonucleotide-diphosphate reductase subunit alpha | | | | | |
| 0.0571 | | 62_1_2680077 | | -6 | | COD | excinuclease ABC subunit C | | | | | |
| 0.0571 | | 62_2_1288889 | | A>G | | S | di-heme cytochrome c peroxidase | | | | | |
| 0.0571 | | 62_1_1465720 | | C>T | | IG | - | | | | | |
| 0.0571 | | 62_3_382570 | | C>T | | NS | xanthine/uracil/vitamin C permease | | | | | |
| 0.0571 | | 62_1_1840176 | | G>A | | NS | cobalamin biosynthesis protein CobW | | | | | |
| 0.0571 | | 62_1_3247269 | | T>C | | NS | diguanylate phosphodiesterase | | | | | |
| 0.0796 | | 74_1_522594 | | +7 | | IG | - | | | | | |
| 0.0796 | | 74_1_873774 | | +1 | | IG | - | | | | | |
| 0.0796 | | 74_1_2680077 | | +6 | | COD | excinuclease ABC subunit C | | | | | |
| 0.0796 | | 74_1_1039807 | | C>G | | IG | - | | | | | |
| 0.0796 | | 74_1_2750800 | | C>G | | NS | LysR family transcriptional regulator | | | | | |
| 0.0796 | | 74_1_219763 | | C>T | | S | hypothetical protein | | | | | |
| 0.0796 | | 74_1_647922 | | C>T | | NS | prepilin peptidase | | | | | |
| 0.0796 | | 74_2_1150973 | | C>T | | NS | alanine dehydrogenase | | | | | |
| 0.0796 | | 74_3_335734 | | G>A | | NS | L-carnitine dehydratase/bile acid-inducible protein F | | | | | |

**Table S6.** Colony counting (CC) measurements repeated in-house for 10 mutation accumulation lines. Cumulative effect of mutations on fitness (scum) shown. ddPCR measurements for same lines are shown in this table. Regression equation for repeated and original colony counts are given as: y=0.623x-0.0146, R square (0.225) and p-value.

| **MA line** | **Cumulative effect of mutations on fitness (scum)** | | | | | |
| --- | --- | --- | --- | --- | --- | --- |
|  | ddPCR(Mean) | In-house CC (Mean) | SEM | CC (Dillon et al., 2016) | SEM | p-value |
| 4 | 0.0037 | 0.032 | 0.02099 | 0.0131 | 0.0111 | 0.946741 |
| 11 | -0.0535 | -0.014 | 0.03117 | 0.0212 | 0.0103 | 0.001940 |
| 13 | -0.0671 | 0.024 | 0.02174 | 0.0155 | 0.0089 | 0.000005 |
| 24 | -0.0571 | -0.007 | 0.0107 | -0.0079 | 0.0102 | 0.000015 |
| 29 | -0.0064 | -0.01 | 0.01527 | -0.0144 | 0.0071 | 0.509891 |
| 49 | -0.0021 | -0.088 | 0.00302 | -0.0726 | 0.0033 | 0.000010 |
| 53 | 0.0071 | -0.0018 | 0.01216 | -0.0092 | 0.0076 | 0.116540 |
| 62 | 0.05708 | 0.003 | 0.01114 | 0.002 | 0.0094 | 0.000001 |
| 63 | -0.12014 | -0.043 | 0.02515 | -0.0338 | 0.014 | 0.000066 |
| 74 | 0.0796 | 0.085 | 0.01498 | 0.0371 | 0.0104 | 0.001625 |

**Table S7.** Primers specific *to B. cenocepacia* HI2424 (Burk) and specific to the lacZ reporter gene inserted at the attTn7 site (M77789.2).

|  |  |  |
| --- | --- | --- |
| Name (Position or Plasmid) | Description | Sequence (5'-3') |
|  |  |  |
| Burk (1593654_1596017) | Forward primer | GCCAATCTGAACCCCGAACAGC |
| Burk (1593654_1596017) | Reverse primer | CTGCCTTGTTCGTGAAGGTGGC |
| Burk (1600223_1601098) | Forward primer | CGATCGTAGATACCACGCGAGCGC |
| Burk (1600223_1601098) | Reverse primer | AGCCACTCGTTCTGGGTCTAGCGC |
| Burk (1743189_1743497) | Forward primer | TGTCGACGTTTGCGGTGAATGC |
| Burk (1743189_1743497) | Reverse primer | CGGACATCGTTACCGGACGGC |
|  |  |  |
| M77789.2(Puc19) _1 | Forward primer | GGGAACCGGAGCTGAATGAAGC |
| M77789.2(Puc19) _1 | Reverse primer | TTGTTGCCGGGAAGCTAGAGGC |
| M77789.2(Puc19) _2 | Forward primer | TGATAACACTGCGGCCAACTGC |
| M77789.2(Puc19) _2 | Reverse primer | TTCATTCAGCTCCGGTTCCCGC |
| M77789.2(Puc19) _3 | Forward primer | AGTGATAACACTGCGGCCAAGC |
| M77789.2(Puc19) _3 | Reverse primer | TCCGGTTCCCAACGATCAAGGC |

**Table S8.** Example ddPCR multiplex calculation. This data represents the control experiment containing wild-type *LacZ*- and mutant *LacZ+* populations used in Figure 1. Where cwt is the number of wild-type droplets, ccombined is the number of wild-type and mutant droplets and ctotal is the total number of droplets. c0 is the number of double negative droplets (contain neither ccombined or cwt), determined by ln(positive/accepted) droplets [106]. The concentration of the wild-type (Na) and the mutant (Nb) are then given by ln(c0+cwt) −ln(c0) and ln(c0+cwt+ccombined)-ln(c0+cwt) respectively. The difference in growth Δrab is equal to the ratio of final to initial concentration or ln(Nfa/Nia) – ln(Nfb/Nib). The cumulative effect of mutations on fitness for a and b (sab) is given by Δrab/G, where G is the generations elapsed by the wild type. For ddPCR measurement in MA lines, LacZ+ is the wild-type and MA lines are the mutant population.

|  |  | **Final** | | | |  | **Initial** | | | |
| --- | --- | --- | --- | --- | --- | --- | --- | --- | --- | --- |
| 96-plate well # |  | C11 | C12 | D11 | D12 |  | G11 | G12 | H11 | H12 |
| c-wt (copies/µL) |  | 4.8 | 5.1 | 4.9 | 4.4 |  | 5 | 4.1 | 3.7 | 3.7 |
| c-combined(copies/µL) |  | 98.3 | 107.9 | 96.3 | 113.6 |  | 55 | 50 | 30.2 | 46.8 |
| c-total(copies/µL) |  | 103.1 | 113 | 101.2 | 118 |  | 60 | 54.1 | 33.9 | 50.5 |
| Positives Droplets |  | 1707 | 1817 | 1591 | 1790 |  | 71 | 896 | 491 | 731 |
| Accepted Droplets |  | 20344 | 19867 | 19297 | 18749 |  | 18941 | 19939 | 17283 | 17395 |
| Positive/Accepted |  | 0.084 | 0.091 | 0.082 | 0.095 |  | 0.004 | 0.045 | 0.028 | 0.042 |
| c0 (copies/nL) |  | 2.48 | 2.39 | 2.50 | 2.35 |  | 5.59 | 3.10 | 3.56 | 3.17 |
| c0*1000 (copies/µL) |  | 2478.05 | 2391.87 | 2495.59 | 2348.92 |  | 5586.40 | 3102.49 | 3561.03 | 3169.52 |
| Na(mutant) |  | 0.0388 | 0.0440 | 0.0378 | 0.0471 |  | 0.0098 | 0.0160 | 0.0084 | 0.0146 |
| Nb(wt) |  | 0.0019 | 0.0021 | 0.0020 | 0.0019 |  | 0.0009 | 0.0013 | 0.0010 | 0.0012 |
| Δrab |  | 0.61 | 0.54 | 0.86 | 0.70 |  |  |  |  |  |
| G |  | 13.66 | 13.75 | 13.69 | 13.54 |  |  |  |  |  |
| sab |  | 0.04 | 0.04 | 0.06 | 0.05 |  |  |  |  |  |

**Table S9.** Observed and expected number of mutations in Lys and Excinuclease genes. Total number of genes include all annotated genes in Chr1 and Chr2 (Hypothetical genes excluded) from the protein table file of *Burkholderia cenocepacia* (4465) multiplied by the number of MA lines surveyed (43). Number of genes for each type determined by the number of that gene type multiplied by the MA lines surveyed. Observed number of mutations are the total number of base-substitution and indel mutations found across all 43 MA lines.

|  | **Obs # of Mutations** | **Exp. # of Mutations** | **# of Gene** | **Total** |
| --- | --- | --- | --- | --- |
| Lys | 8 | 3.45 | 8170 | 8178 |
| Non-Lys | 73 | 77.55 | 183825 | 183898 |
| Total | 81 | 81 | 191995 | 192076 |
|  |  |  |  |  |
| Excinuclease | 3 | 0.04 | 86 | 89 |
| Non-Excinuclease | 78 | 80.96 | 191909 | 191987 |
| Total | 81 | 81 | 191995 | 192076 |

**References Cited**

Choi, K.-H., J. B. Gaynor, K. G. White, C. Lopez, C. M. Bosio, R. R. Karkhoff-Schweizer and H. P. Schweizer (2005). "A Tn7-based broad-range bacterial cloning and expression system." Nature methods **2**(6): 443-448.

Craig, N. L. (1996). "Transposon Tn7." Curr Top Microbiol Immunol **204**: 27-48.

Dillon, M. M. and V. S. Cooper (2016). "The Fitness Effects of Spontaneous Mutations Nearly Unseen by Selection in a Bacterium with Multiple Chromosomes." Genetics **204**(3): 1225-1238.

Gish, W. (1993). "Identification of protein coding regions by database similarity search." Nature genetics **3**(3): 266.

Hoang, T. T., R. R. Karkhoff-Schweizer, A. J. Kutchma and H. P. Schweizer (1998). "A broad-host-range Flp-FRT recombination system for site-specific excision of chromosomally-located DNA sequences: application for isolation of unmarked Pseudomonas aeruginosa mutants." Gene **212**(1): 77-86.

Koressaar, T. and M. Remm (2007). "Enhancements and modifications of primer design program Primer3." Bioinformatics **23**(10): 1289-1291.

Peters, J. E. and N. L. Craig (2001). "Tn7: smarter than we thought." Nature reviews. Molecular cell biology **2**(11): 806-814.
